1 **Spatial and Temporal Distribution of Visceral Leishmaniasis in Karamoja Region,**  
2 **Uganda: Analysis of surveillance data, 2015–2022**

3 **Authors:** Mercy Wendy Wanyana<sup>1\*</sup>, Richard Migisha<sup>1</sup>, Patrick King<sup>1</sup>, Benon Kwesiga<sup>1</sup>,  
4 Daniel Kadobera<sup>1</sup>, Lilian Bulage<sup>1</sup>, Alex Riolexus Ario<sup>1</sup>

5 **Institutional affiliations:** <sup>1</sup>Uganda Public Health Fellowship Program, Uganda National  
6 Institute of Public Health, Kampala, Uganda

7 **\*Correspondence:** Email: [mwanyana@uniph.go.ug](mailto:mwanyana@uniph.go.ug), Tel: +256779207928

8  
9

10 **Abstract**

11  
12 **Background:** Uganda targets to control leishmaniasis and eliminate visceral  
13 leishmaniasis as a public health problem by 2030, with 85% of the cases detected, 95%  
14 treated, and visceral leishmaniasis eliminated (<1% case fatality rate [CFR]). However,  
15 little is documented on the country's progress towards achieving these targets. We  
16 examined the temporal trends and spatial distribution of leishmaniasis in the endemic  
17 Karamoja Region of Uganda, 2015–2022.

18 **Methods:** We analysed aggregate secondary data on clinically diagnosed leishmaniasis  
19 laboratory-confirmed cases, visceral leishmaniasis cases, hospital admissions, and  
20 deaths from the District Health Information System 2. We used population-based  
21 calculations to determine the annual prevalence of leishmaniasis and quarterly  
22 prevalence of visceral leishmaniasis per 1,000,000 persons, while the prevalence of  
23 leishmaniasis admissions and CFRs were calculated per 100 cases. We used the  
24 Mann-Kendall test to assess the significance of the trend.

25 **Results:** Overall, 4,008 cases of clinically diagnosed leishmaniasis were reported, and  
26 of these, 11% were laboratory-confirmed. The average annual prevalence of  
27 leishmaniasis was 4 per 1,000,000 population. From 2020 to 2022, there was an  
28 increasing trend in quarterly prevalence of visceral leishmaniasis (Kendall's score=36,  
29 p=0.016), averaging 3 cases per 1,000,000 population. Leishmaniasis admissions  
30 increased annually to 55 per 100 cases (Kendall's score=23, p=0.006). The average  
31 annual CFR was 5%, with no deaths reported in 2018, 2019, and 2021. Amudat District  
32 had the highest prevalence rates of leishmaniasis (477 per 1,000,000 population) and  
33 visceral leishmaniasis (139 per 100,000 population).

34 **Conclusion:** The increasing trend of visceral leishmaniasis, and CFR >1% threaten the  
35 goal of controlling leishmaniasis as a public health problem by 2030. Gaps in case  
36 detection may further prevent the achievement of targets. Strengthening existing  
37 interventions, such as vector control and rapid diagnostic kits for early detection and  
38 treatment, may be crucial to sustain progress toward elimination targets.

39

40 **Keywords:** Leishmaniasis, Visceral leishmaniasis, Disease control, Uganda

41



## 43 Background

44 Leishmaniasis is a vector-borne neglected tropical disease caused by a protozoan and  
45 transmitted by a female sand fly mainly of *Phlebotomus* species<sup>1</sup>. Transmission occurs  
46 when an infected female sand fly bites a human host and transmits the parasite to the  
47 host during its blood meal<sup>2</sup>. The disease clinically manifests in three forms: cutaneous,  
48 mucocutaneous and visceral<sup>3</sup>. Clinical presentation usually depends on the virulence of  
49 the parasite, the individual's immunity, and the site of the lesion<sup>4</sup>. The cutaneous form is  
50 the mildest form, typically presenting with painless nodules, macules, papules or  
51 ulcerative lesions on the skin in areas exposed to bites of the sand fly. It is commonly  
52 linked to the *Leishmania major* and *Leishmania tropica* species<sup>2</sup>. The mucosal form  
53 typically presents with lesions on the mucus membranes and cartilage in the nose,  
54 mouth, upper respiratory tract, and pharynx<sup>5</sup>. Visceral leishmaniasis manifests as fever,  
55 weight loss, splenomegaly, hepatomegaly, and reduced blood cell production,  
56 potentially causing anemia, bleeding, and susceptibility to other infections<sup>6,7</sup>. Visceral  
57 Leishmaniasis, often associated with *L. donovani* in East Africa, is highly fatal with a  
58 95% untreated case fatality rate and 10-20% with treatment<sup>8,9</sup>. It carries outbreak  
59 potential, with sequelae like relapse and post-kala-azar dermal leishmaniasis,  
60 contributing to interepidemic reservoirs and sustaining transmission.

61  
62 As of 2019, approximately 4,580,000 cases of leishmaniasis were reported globally,  
63 causing an estimated 657,000 new cases annually and resulting in 697,000 Disease  
64 Adjusted Life Years (DALYs) lost<sup>10</sup>. African countries including Uganda contribute a  
65 significant proportion of the burden, accounting for 34-57%<sup>11</sup>. Leishmaniasis  
66 disproportionately impacts the poorest populations due to factors such as inadequate  
67 housing, poor environmental sanitation, lack of control measures, and economically  
68 driven migration to vector-prone areas, increasing their susceptibility to the disease<sup>12,13</sup>.  
69 Children and immunocompromised individuals, including People Living with HIV  
70 (PLWHIV), are more affected than adults and non-immunocompromised individuals<sup>14,15</sup>.

71  
72 Leishmaniasis places a catastrophic financial burden on affected households with a  
73 median cost ranging from USD 165 to 1,500 per episode<sup>13,16</sup>. To avert this burden,  
74 current global efforts aim at controlling leishmaniasis and eliminate leishmaniasis by  
75 2030 through the World Health Organization(WHO) Roadmap for neglected tropical  
76 diseases 2021–2030<sup>17</sup>. Specifically, this aims to ensure that 85% of all leishmaniasis  
77 cases are detected, 95% treated, and visceral leishmaniasis eliminated (<1% case  
78 fatality rate [CFR]); this includes Uganda where the disease is endemic especially in the  
79 Karamoja Region. Currently there is a paucity of data on the country's progress and  
80 burden of leishmaniasis. This could be attributed to the limited analysis of surveillance  
81 data despite it's being in the national integrated disease surveillance system.<sup>18</sup> Analysis  
82 of the surveillance data is key to detect remaining or re-emerging hotspots of  
83 leishmaniasis transmission which supports timely adaptation of control and elimination  
84 interventions<sup>19</sup>. Given the complexity of leishmaniasis management and diagnostics,  
85 control efforts adopt an innovative and intensified disease management approach,  
86 emphasizing individual care at health facilities<sup>20</sup>. As such, understanding trends in  
87 health facility leishmaniasis data is crucial for evidence-based decision-making. We

88 examined the temporal trends and spatial distribution of leishmaniasis in the endemic  
89 Karamoja Region of Uganda, 2015–2022.

## 90 **Methods**

### 91 **Study settings**

92 We utilised leishmaniasis surveillance data generated from all health facilities in the  
93 Karamoja region in the years 2015–2022. Leishmaniasis is endemic in the Karamoja  
94 region in Uganda. The semi-arid climate and termite hills in this region provide a  
95 favourable environment for sand flies of *Phlebotomus* species which are the vector  
96 responsible for transmission of Visceral Leishmaniasis<sup>21</sup>. Within Uganda health facilities  
97 leishmaniasis is diagnosed clinically and confirmed using a Giemsa-stain slides viewed  
98 under a microscope.

### 99 **Study design and data Source**

100 We conducted a descriptive study using routinely collected leishmaniasis surveillance  
101 data collected in District Health Information System 2 (DHIS-2). The DHIS-2 collects  
102 data on diseases of public health importance like leishmaniasis based on the Integrated  
103 Disease Surveillance and response guidelines.<sup>22</sup> It includes data on both clinically  
104 diagnosed and laboratory confirmed leishmaniasis cases, admissions, primary visceral  
105 leishmaniasis i.e. without history of visceral leishmaniasis treatment, relapse i.e. with  
106 history of visceral leishmaniasis treatment, post-kala-azar dermal leishmaniasis, a  
107 complication of visceral leishmaniasis and leishmaniasis HIV co-infection, and deaths.  
108 Before 2020, all forms of leishmaniasis (cutaneous, visceral and mucosal) were  
109 reported jointly in the monthly outpatient and in-patient registers. In 2020, an in-patient  
110 tool that collects primary visceral leishmaniasis, relapse and leishmaniasis HIV co-  
111 infection was introduced. In this study, we utilized aggregate data of on leishmaniasis  
112 from monthly outpatient reports (Health Management Information System forms [HMIS]  
113 105) 2015–2022, inpatient monthly reports (HMIS 108) 2015–2022, and (HMIS 127b)  
114 2020–2022.

### 115 **Study variables, data management, and analysis**

116 We downloaded the data regarding clinically-diagnosed and laboratory-confirmed  
117 leishmaniasis cases and admissions, primary visceral leishmaniasis, relapse visceral  
118 leishmaniasis, post-kala-azar dermal leishmaniasis, and visceral leishmaniasis HIV co-  
119 infection, and death.in excel and imported in STATA version 16 software (StataCorp,  
120 College Station, Texas, USA) for analysis. Using data on leishmaniasis and visceral  
121 leishmaniasis cases, we calculated the annual prevalence of leishmaniasis as  
122 laboratory confirmed leishmaniasis cases divided by the population in the region. From  
123 2020 to 2022, we assessed the proportions of primary, relapse, post-kala-azar dermal  
124 leishmaniasis, and HIV co-infection among admitted Visceral Leishmaniasis cases.  
125 Quarterly prevalence of Visceral Leishmaniasis was calculated as the ratio of primary  
126 and relapse cases to the population, obtained from Uganda Bureau of Statistics.  
127 Leishmaniasis admissions and hospitalization prevalence were determined using

128 leishmaniasis cases as denominators. Case fatality rates were computed based on the  
129 proportion of deceased leishmaniasis cases. Line graphs were used to show trends,  
130 and Mann-Kendall test to assess the significance of trends. We used choropleth maps  
131 created with QGIS software to illustrate the spatial distribution of leishmaniasis in the  
132 region.

### 133 **Ethical Considerations**

134 Our study utilized routinely generated aggregated surveillance data with no personal  
135 identifiers in health facility outpatient and in-patient monthly reports, obtained from the  
136 DHIS-2. The Uganda Public Health Fellowship Program is part of the National Rapid  
137 Response Team, and has been granted permission to access and analyse surveillance  
138 data in the DHIS-2 and other data such as survey and field investigation data to inform  
139 decision making in the control and prevention of outbreaks and public health  
140 programming. Additionally, the Ministry of Health (MoH) has also granted the program  
141 permission to disseminate the information through scientific publications. We stored the  
142 abstracted data set in a password-protected computer and only shared it with the  
143 investigation team. In addition, the Office of the Associate Director for Science, U.S.  
144 Centers for Disease Control and Prevention, determined that this study was not a  
145 human subjects research with the primary intent of improving use of surveillance data to  
146 guide public health planning and practice.

147 This activity was reviewed by CDC and was conducted consistent with applicable  
148 federal law and CDC policy. §  
149 §See e.g., 45 C.F.R. part 46, 21 C.F.R. part 56; 42 U.S.C. §241(d); 5 U.S.C. §552a; 44  
150 U.S.C. §3501 et seq.  
151

### 152 **Results**

#### 153 **Trends in the prevalence of leishmaniasis, Karamoja Region, Uganda, 2015-2022**

154 Reporting rates for the Karamoja region ranged from 96% to 100% during the review  
155 period (from 2015 to 2022). Overall, 4,008 clinically-diagnosed leishmaniasis cases were  
156 reported. Of these, 484 (11%) were confirmed. The average annual prevalence of  
157 leishmaniasis was 4 cases per 1,000,000 population in the Karamoja Region reported  
158 from 2015 to 2022. No trend in leishmaniasis prevalence was observed, Kendall's score=  
159 13,  $p=0.173$  (Figure 1).

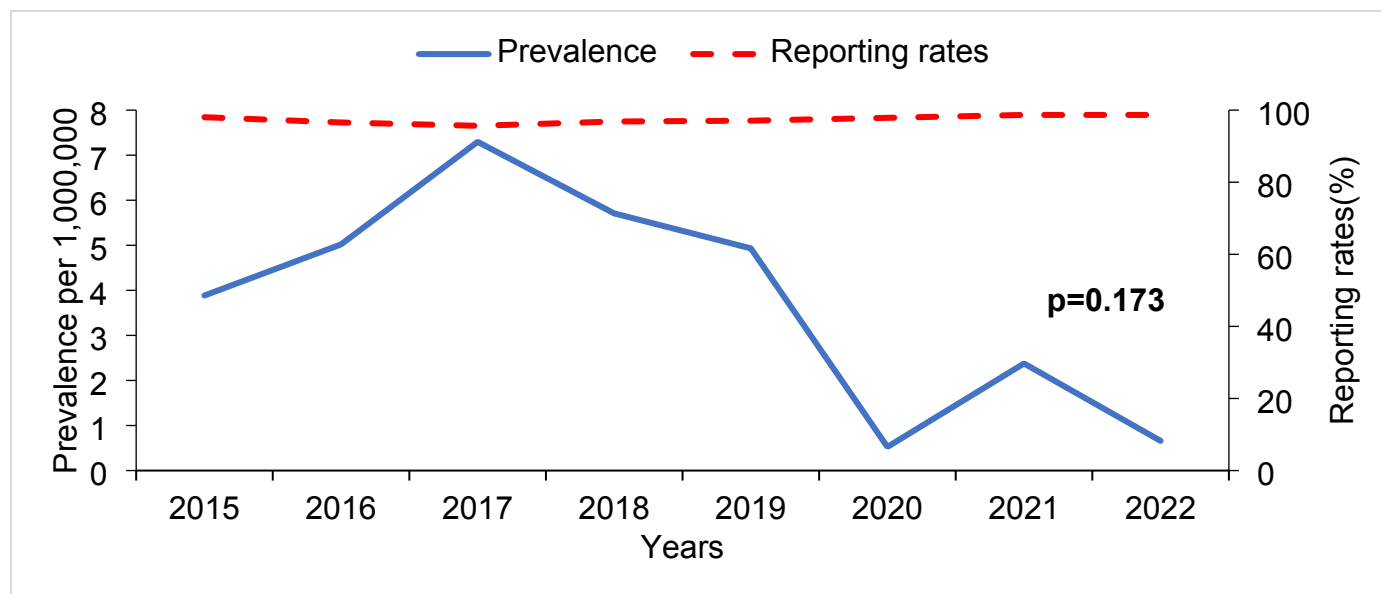

160

161 **Figure 1: Trends in annual leishmaniasis prevalence, Karamoja Region, Uganda,**  
162 **2015–2022**

163

164 **Trends of the quarterly prevalence of visceral leishmaniasis, Karamoja Region,**  
165 **Uganda, 2020–2022**

166 Over the review period, 602 visceral leishmaniasis cases were reported. Of these 540  
167 (90%) were primary visceral leishmaniasis cases while 62 (10%) were relapse cases. Of  
168 the total cases, 4 (1%) were visceral leishmaniasis HIV-coinfected and 5 (1%) were  
169 post-kala-azar dermal leishmaniasis. The average quarterly prevalence of visceral  
170 leishmaniasis cases was 3 cases per million with the highest prevalence (5 cases per  
171 1,000,000 population) reported in the quarter 3 of 2022 (Figure 2). From 2020 to 2022,  
172 there was an increasing trend in the quarterly prevalence of visceral leishmaniasis,  
173 Kendall's score=36,  $p=0.016$ .

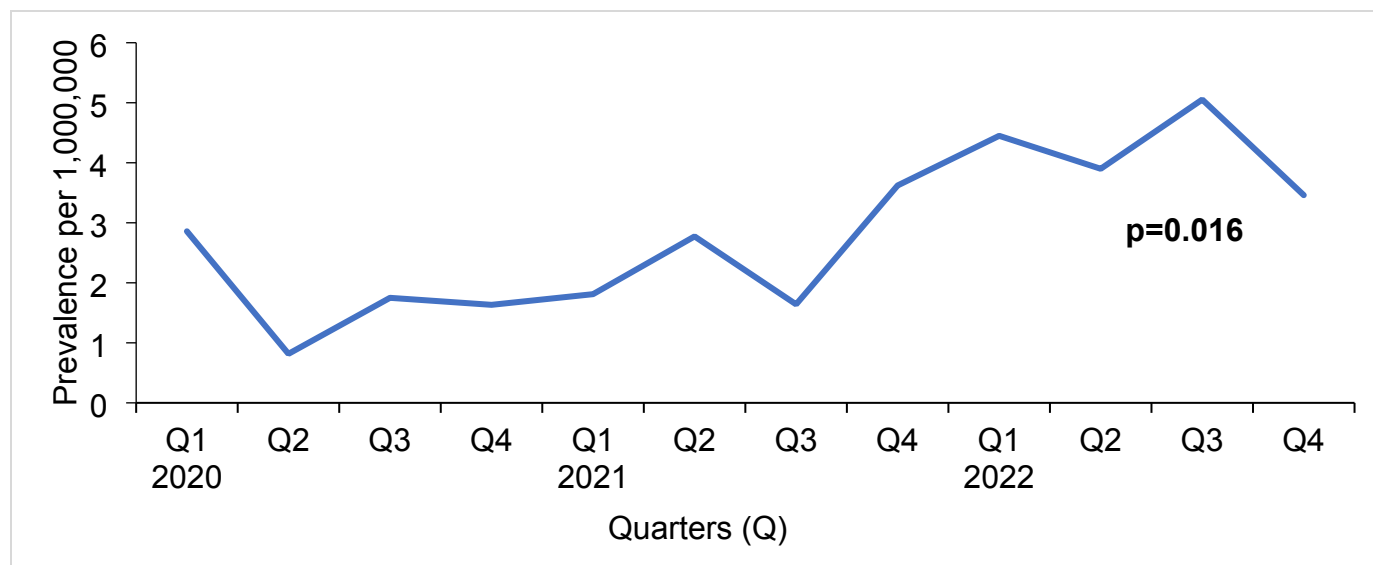

174

175 **Figure 2: Trends in quarterly prevalence of visceral leishmaniasis, Karamoja**  
176 **Region, Uganda, 2020–2022.**

177 **Trends of leishmaniasis admissions, Karamoja Region, Uganda, 2015–2022**

178 From 2015 to 2022, the average annual prevalence of leishmaniasis admission in the  
179 Karamoja region was 52 cases per 100 cases. The highest incidence of leishmaniasis  
180 admissions were reported in the years 2020 (87 leishmaniasis admissions per 100  
181 cases), 2021 (93 leishmaniasis admissions per 100 cases), and 2022 (92 leishmaniasis  
182 admissions per 100 cases) (Figure 3). Overall there was an increasing trend of  
183 leishmaniasis admissions, Kendall's score= 23, p=0.006.

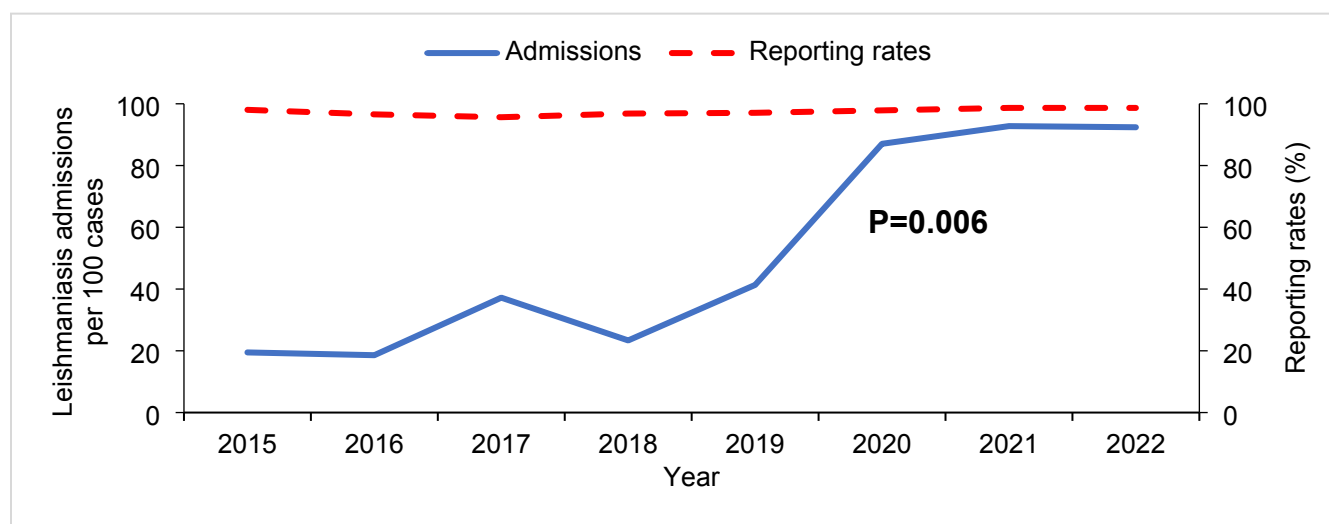

184

185 **Figure 3: Trends in hospital admissions due to leishmaniasis in Karamoja Region,**  
186 **Uganda, 2015–2022.**

187

188 **Leishmaniasis case fatality rate, Karamoja region, Uganda, 2015–2022**

189 During the review period, the average annual CFR was 5% (Range: 0-11%), with no  
190 deaths reported in 2018, 2019, and 2021. The highest case fatality rates was recorded in  
191 2020. No trends were observed in the case fatality rate, Kendall's score= -2, p=0.947  
192 (Figure 4).

193

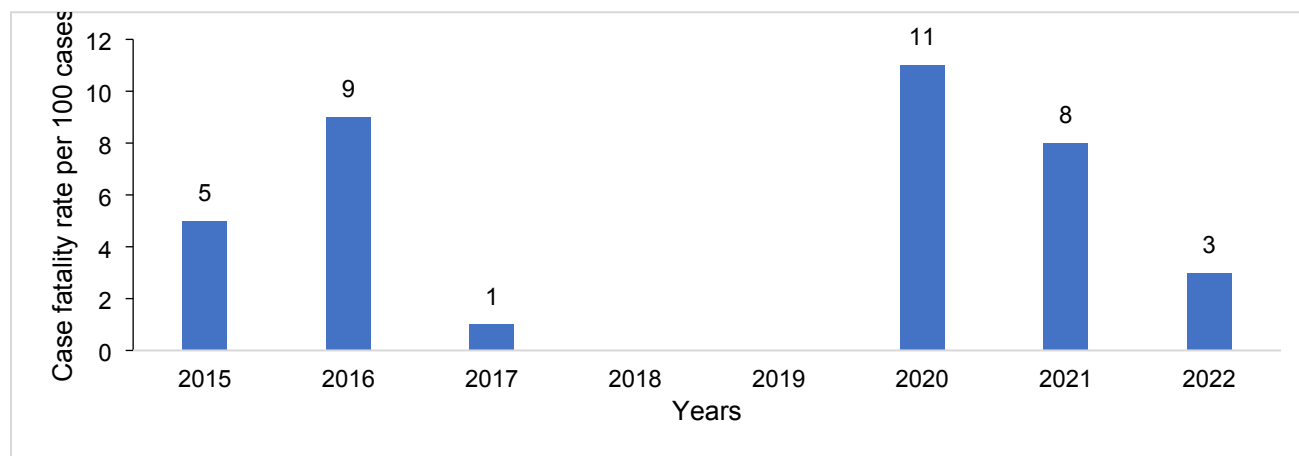

194

195 **Figure 4: Trends in leishmaniasis case fatality rate, Karamoja Region, Uganda,**  
196 **2015–2022**

197 **Spatial distribution of Leishmaniasis, Karamoja Region, Uganda, 2015–2022**

198 Within the Karamoja Region, Amudat District reported the highest average annual  
199 prevalence of both leishmaniasis (477 per 1,000,000 population) and visceral  
200 leishmaniasis (139 per 100,000 population). Abim, Kaabong, Karenga, and Nabilatuk  
201 did not report both leishmaniasis and visceral leishmaniasis cases during the reporting  
202 period.

203



204

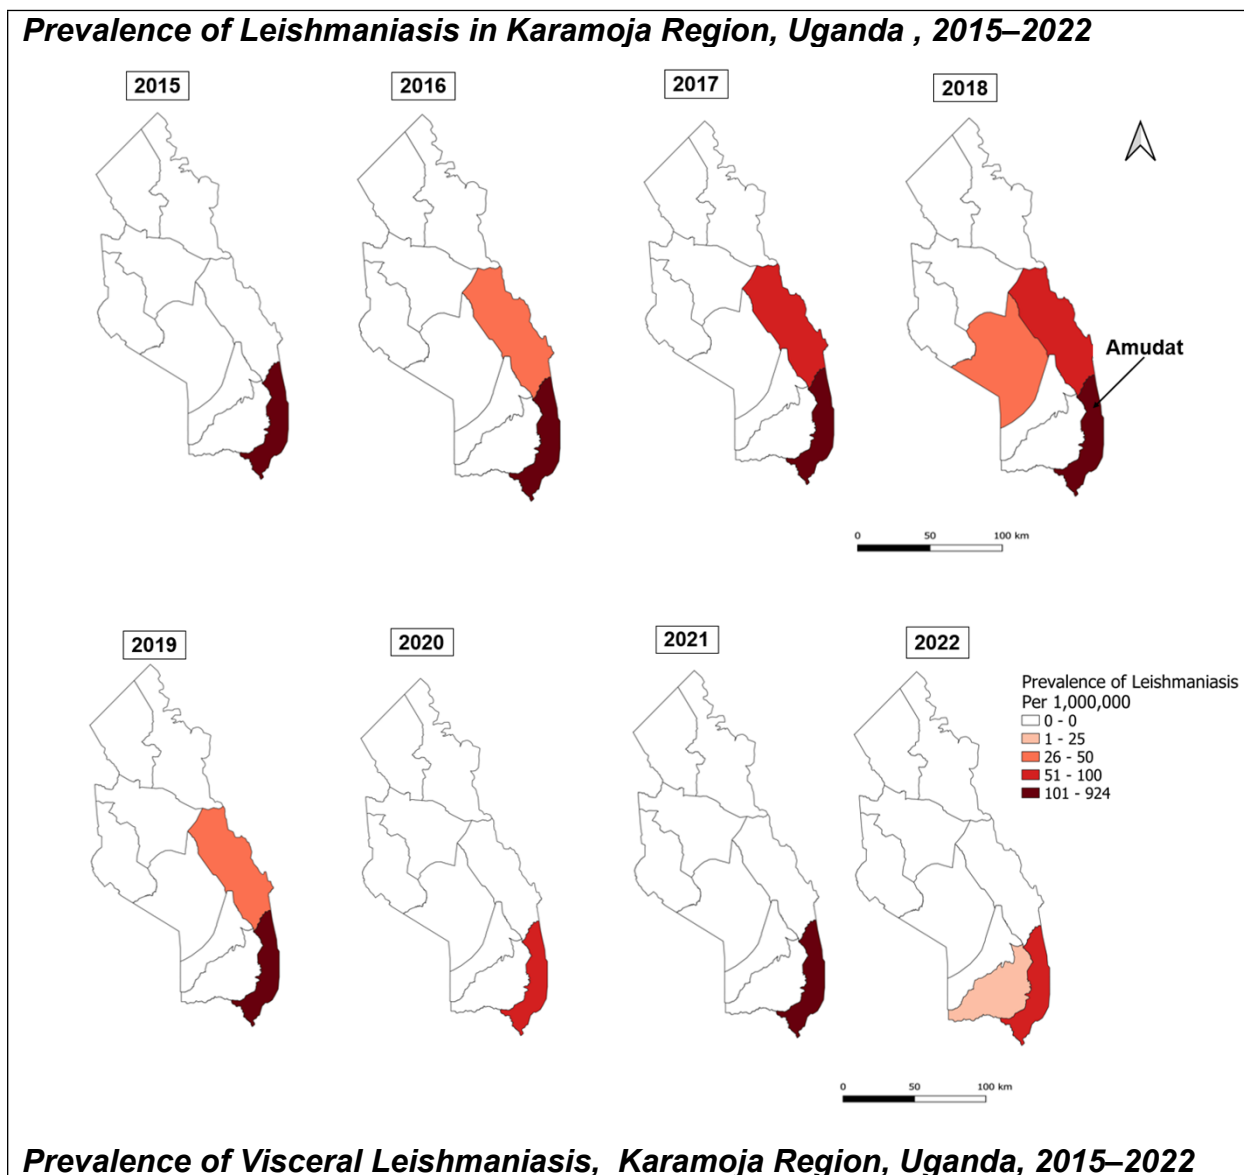

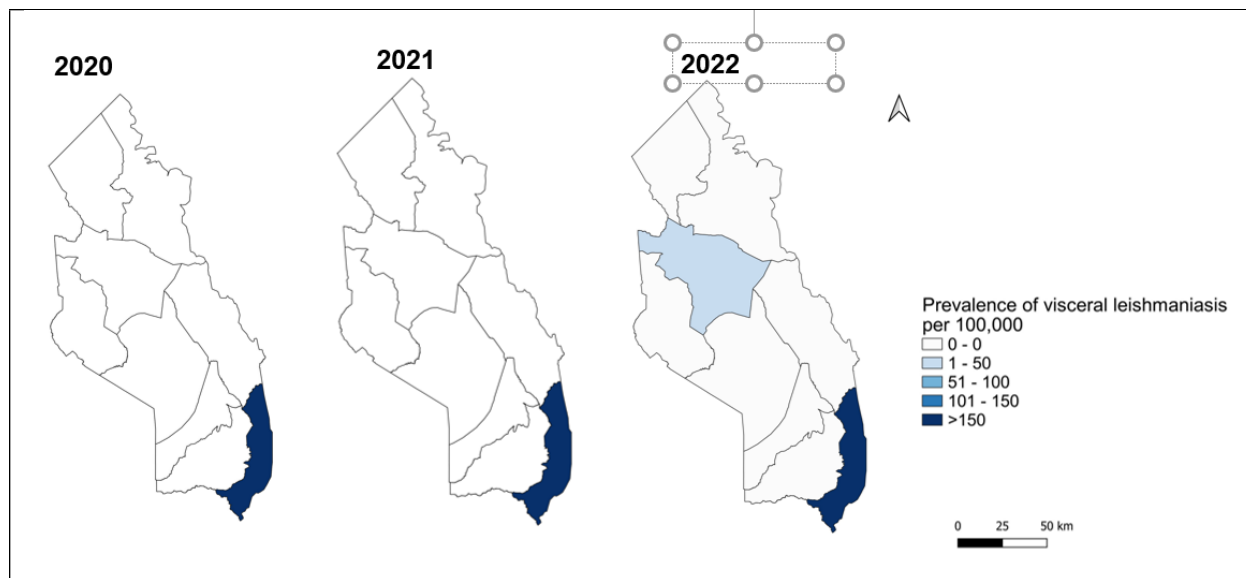

205

206 **Figure 5: Spatial distribution of leishmaniasis and visceral leishmaniasis,**  
207 **Karamoja Region, Uganda, 2015–2022**

208

## 209 Discussion

210 In this analysis to examine the temporal trends and spatial distribution of leishmaniasis  
211 in an endemic Karamoja Region of Uganda, 2015–2022, only 11% of the clinically-  
212 diagnosed leishmaniasis cases were laboratory confirmed. Over the review period, no  
213 changes were observed in the annual prevalence of leishmaniasis. While most visceral  
214 leishmaniasis cases were primary, we identified relapse, post-kala-azar dermal  
215 leishmaniasis, and visceral leishmaniasis HIV coinfecting cases between 2020 and  
216 2022. A rising trend in quarterly prevalence of visceral leishmaniasis occurred from  
217 quarter one (Q1) 2020 to quarter four (Q4) 2022, along with an increase in hospital  
218 admissions due to leishmaniasis. The average annual CFR remained <1%, with no  
219 deaths reported in 2018, 2019, and 2021. Amudat District had the highest leishmaniasis  
220 prevalence.

221

222 We identified gaps in case detection, with only 11% of clinically-diagnosed cases  
223 confirmed by laboratory investigations. Leishmaniasis shares clinical features with  
224 common regional illnesses like malaria, typhoid, and tuberculosis, emphasizing the  
225 importance of laboratory confirmation in case detection<sup>23</sup>. In the East African region,  
226 numerous factors may hinder laboratory confirmation for leishmaniasis including low  
227 proportions of health facilities with microscopes and microscopy supplies and trained  
228 staff in leishmaniasis testing<sup>24</sup>. Such existing gaps may hinder achievement of  
229 leishmaniasis targets of 85% of all leishmaniasis cases detected.

230

231 In contrast to the global declining trends in leishmaniasis prevalence, no significant  
232 trends were observed in the Karamoja Region for leishmaniasis cases from 2015 to

233 2022<sup>25,26</sup>. The Karamoja Region like the rest of East Africa faces unique challenges that  
234 may prevent declines despite targets. The Karamoja Region like the rest of East Africa  
235 faces unique challenges that may prevent declines despite targets, including poor at-  
236 risk population with limited access to healthcare and insecurity in endemic regions<sup>19</sup>.  
237 Our findings further indicated an increase in the quarterly prevalence of visceral  
238 leishmaniasis cases from 2020 to 2022. This trend is similar to global leishmaniasis  
239 surveillance data that indicated an increase in visceral leishmaniasis in the East African  
240 Region during 2020<sup>11</sup>. During this period, vital control programs supporting the region,  
241 such as the Accelerating the Sustainable Control and Elimination of Neglected Tropical  
242 Diseases, were terminated. This resulted in the scaling down of control efforts<sup>27</sup>. The  
243 increase in visceral leishmaniasis cases following termination of control programmes  
244 may undo previous gains towards achievement of elimination targets. Furthermore, we  
245 found Visceral Leishmaniasis relapse and post-kala-azar dermal leishmaniasis (PKDL)  
246 cases. The presence of these cases contributes to the maintenance of infectious  
247 reservoirs, posing a threat to the achievement of elimination targets<sup>28</sup>.

248 Our findings revealed a considerable number of hospital admissions due to  
249 leishmaniasis. This suggests a sustained burden of visceral leishmaniasis whose illness  
250 and management often requires hospitalisation<sup>29</sup>. Admissions due to leishmaniasis  
251 impose a substantial economic burden on households, with a median expenditure of  
252 450 US dollars per hospital stay due to leishmaniasis<sup>30</sup>. We found that hospital  
253 admissions linked to leishmaniasis increased. This might suggest gaps in treatment of  
254 leishmaniasis resulting in leishmaniasis complications that may require in-patient  
255 admissions.

256 The average annual CFR was still greater than the 1% target by 2030. This indicated  
257 that Uganda is yet to achieve the control leishmaniasis and eliminate visceral  
258 leishmaniasis as a public health elimination. The no trend observed in CFR and its  
259 substantial variation in the CFR from 0 to 11% suggests a need for intensifying efforts to  
260 ensure targets are met. Such efforts include improving prompt diagnosis of visceral  
261 leishmaniasis using rapid diagnostic kits and increasing access to prompt effective  
262 treatment.

263 In regards to the current distribution, Amudat had the highest prevalence of both  
264 leishmaniasis and visceral leishmaniasis. This pattern may be attributed to presence of  
265 a referral leishmaniasis treatment centre at Amudat Hospital<sup>31</sup>.

266 Our findings should be interpreted with considerations of the following limitations. Our  
267 use of facility-based data may lead to an underestimation of the true disease burden,  
268 capturing only individuals seeking healthcare. Previous studies have indicated that  
269 surveillance data may underreport the burden of leishmaniasis up to 8 fold for visceral  
270 leishmaniasis and 5 fold for cutaneous leishmaniasis<sup>9</sup>. Additionally, our reliance on  
271 aggregate data restricted further exploration of prevalence in population subcategories  
272 and specific clinical types of leishmaniasis.

273 **Conclusion**

274 The current burden of leishmaniasis coupled with gaps in case detection threatens the  
275 achievement of control of leishmaniasis targets. While the increasing trends of visceral  
276 leishmaniasis and variation in case fatality rates question whether achieved visceral  
277 leishmaniasis targets will be met by 2030. Existing interventions should be intensified to  
278 including vector control, rapid diagnostic kits for early detection and prompt treatment  
279 should be intensified to sustain the achievement of elimination targets.

280

281 **List of abbreviations**

282 CFR: Case Fatality Rate  
283 DHIS-2: District Health Information System 2  
284 HMIS: Health Management Information System  
285 NTD: Neglected Tropical Disease  
286 PKDL: Post-kala-azar Dermal Leishmaniasis

287

288

289

290

291

292

293

## 294 Acknowledgements

295 We would like to thank the Ministry of Health for providing access to DHIS2 data that  
296 was used for this analysis. We appreciate the technical support provided by the Division  
297 of Surveillance, Information and Knowledge Management and the Division of Vector  
298 Control. Finally, we thank the US-CDC for supporting the activities of the Uganda Public  
299 Health Fellowship Program.

300

## 301 References

- 302 1. Torres-Guerrero E, Quintanilla-Cedillo MR, Ruiz-Esmenjaud J, Arenas R.  
303 Leishmaniasis: a review. *F1000Research*. 2017;6:750.
- 304 2. Bates PA. Transmission of *Leishmania* metacyclic promastigotes by phlebotomine  
305 sand flies. *Int J Parasitol*. 2007 Aug;37(10):1097–106.
- 306 3. Burza S, Croft SL, Boelaert M. Leishmaniasis. *Lancet* (London, England). 2018  
307 Sep;392(10151):951–70.
- 308 4. Mokni M. [Cutaneous leishmaniasis]. *Ann Dermatol Venereol*. 2019  
309 Mar;146(3):232–46.
- 310 5. Handler MZ, Patel PA, Kapila R, Al-Qubati Y, Schwartz RA. Cutaneous and  
311 mucocutaneous leishmaniasis: Clinical perspectives. *J Am Acad Dermatol*  
312 [Internet]. 2015 Dec 1;73(6):897–908. Available from:  
313 <https://doi.org/10.1016/j.jaad.2014.08.051>
- 314 6. Bi K, Chen Y, Zhao S, Kuang Y, John Wu C-H. Current Visceral Leishmaniasis  
315 Research: A Research Review to Inspire Future Study. *Biomed Res Int*.  
316 2018;2018:9872095.
- 317 7. van Griensven J, Diro E. Visceral leishmaniasis. *Infect Dis Clin North Am*. 2012  
318 Jun;26(2):309–22.
- 319 8. Chappuis F, Sundar S, Hailu A, Ghalib H, Rijal S, Peeling RW, et al. Visceral  
320 leishmaniasis: what are the needs for diagnosis, treatment and control? *Nat Rev*  
321 *Microbiol* [Internet]. 2007;5(11):873–82. Available from:  
322 <https://doi.org/10.1038/nrmicro1748>
- 323 9. Alvar J, Vélez ID, Bern C, Herrero M, Desjeux P, Cano J, et al. Leishmaniasis  
324 worldwide and global estimates of its incidence. *PLoS One*. 2012;7(5):e35671.
- 325 10. IHE (Institute for Health Metrics and Evaluation). Leishmaniasis- Level 3 Cause  
326 [Internet]. 2019 [cited 2023 Feb 1]. Available from:  
327 [https://www.healthdata.org/results/gbd\\_summaries/2019/leishmaniasis-level-3-](https://www.healthdata.org/results/gbd_summaries/2019/leishmaniasis-level-3-cause)  
328 [cause](https://www.healthdata.org/results/gbd_summaries/2019/leishmaniasis-level-3-cause)
- 329 11. mondiale de la Santé O, Organization WH. Global leishmaniasis surveillance:  
330 2019–2020, a baseline for the 2030 roadmap—Surveillance mondiale de la  
331 leishmaniose: 2019-2020, une période de référence pour la feuille de route à

- 332 l'horizon 2030. *Wkly Epidemiol Rec Relev Épidémiologique Hebd.*  
333 2021;96(35):401–19.
- 334 12. Alvar J, Yactayo S, Bern C. Leishmaniasis and poverty. *Trends Parasitol.* 2006  
335 Dec;22(12):552–7.
- 336 13. Okwor I, Uzonna J. Social and Economic Burden of Human Leishmaniasis. *Am J*  
337 *Trop Med Hyg.* 2016 Mar;94(3):489–93.
- 338 14. Lindoso JAL, Moreira CHV, Cunha MA, Queiroz IT. Visceral leishmaniasis and  
339 HIV coinfection: current perspectives. *HIV AIDS (Auckl).* 2018;10:193–201.
- 340 15. Gupta AK, Singh A, Srivastava S, Shankar P, Singh S. Visceral Leishmaniasis in  
341 children: Diagnosis, treatment, and prevention. *J Pediatr Infect Dis.*  
342 2017;12(04):214–21.
- 343 16. Uranw S, Meheus F, Baltussen R, Rijal S, Boelaert M. The Household Costs of  
344 Visceral Leishmaniasis Care in South-eastern Nepal. *PLoS Negl Trop Dis*  
345 [Internet]. 2013 Feb 28;7(2):e2062. Available from:  
346 <https://doi.org/10.1371/journal.pntd.0002062>
- 347 17. Casulli A. New global targets for NTDs in the WHO roadmap 2021–2030. *PLoS*  
348 *Negl Trop Dis* [Internet]. 2021 May 13;15(5):e0009373. Available from:  
349 <https://doi.org/10.1371/journal.pntd.0009373>
- 350 18. MoH (Ministry of Health Uganda). Sustainability Plan for Neglected Tropical  
351 Diseases Control Program [Internet]. Kampala, Uganda; 2020. Available from:  
352 [http://library.health.go.ug/publications/neglected-tropical-diseases/sustainability-](http://library.health.go.ug/publications/neglected-tropical-diseases/sustainability-plan-neglected-tropical-diseases-control)  
353 [plan-neglected-tropical-diseases-control](http://library.health.go.ug/publications/neglected-tropical-diseases/sustainability-plan-neglected-tropical-diseases-control)
- 354 19. Alvar J, den Boer M, Dagne DA. Towards the elimination of visceral leishmaniasis  
355 as a public health problem in east Africa: reflections on an enhanced control  
356 strategy and a call for action. *Lancet Glob Heal.* 2021 Dec;9(12):e1763–9.
- 357 20. Engels D, Zhou X-N. Neglected tropical diseases: an effective global response to  
358 local poverty-related disease priorities. *Infect Dis Poverty* [Internet]. 2020;9(1):10.  
359 Available from: <https://doi.org/10.1186/s40249-020-0630-9>
- 360 21. Jones CM, Welburn SC. Leishmaniasis Beyond East Africa. *Front Vet Sci.*  
361 2021;8:618766.
- 362 22. MoH (Ministry of Health Uganda). National Technical Guidelines for Integrated  
363 Disease Surveillance and Response Third Edition [Internet]. 2021. Available from:  
364 [https://www.afro.who.int/sites/default/files/2021-09/2\\_Uganda\\_3rd\\_IDSR\\_Tech](https://www.afro.who.int/sites/default/files/2021-09/2_Uganda_3rd_IDSR_Tech_Guideline_PrintVersion_10Sep2021.pdf)  
365 [Guideline\\_PrintVersion\\_10Sep2021.pdf](https://www.afro.who.int/sites/default/files/2021-09/2_Uganda_3rd_IDSR_Tech_Guideline_PrintVersion_10Sep2021.pdf)
- 366 23. Thakur S, Joshi J, Kaur S. Leishmaniasis diagnosis: an update on the use of  
367 parasitological, immunological and molecular methods. *J Parasit Dis Off organ*  
368 *Indian Soc Parasitol.* 2020 Jun;44(2):253–72.
- 369 24. de Souza DK, Picado A, Bessell PR, Liban A, Wachira D, Mwititi D, et al.  
370 Strengthening Visceral Leishmaniasis Diagnosis Capacity to Improve Access to

- 371 Care in Kenya: The Example of Marsabit County. *Front Trop Dis* [Internet].  
372 2022;2. Available from:  
373 <https://www.frontiersin.org/articles/10.3389/fitd.2021.809757>
- 374 25. Alatif H. Burden and Trends of Leishmaniasis over the last one Decade Across  
375 the Globe: Trend Analysis of WHO Regions. *Integr J Med Sci* [Internet]. 2020;8.  
376 Available from: <https://mbmj.org/index.php/ijms/article/view/295>
- 377 26. Kyu HH, Abate D, Abate KH, Abay SM, Abbafati C, Abbasi N, et al. Global,  
378 regional, and national disability-adjusted life-years (DALYs) for 359 diseases and  
379 injuries and healthy life expectancy (HALE) for 195 countries and territories,  
380 1990&#x2013;2017: a systematic analysis for the Global Burden of Disease Study  
381 2017. *Lancet* [Internet]. 2018 Nov 10;392(10159):1859–922. Available from:  
382 [https://doi.org/10.1016/S0140-6736\(18\)32335-3](https://doi.org/10.1016/S0140-6736(18)32335-3)
- 383 27. Makoni M. New threats to visceral leishmaniasis control. *The Lancet Microbe*  
384 [Internet]. 2021 Nov 1;2(11):e574. Available from: [https://doi.org/10.1016/S2666-](https://doi.org/10.1016/S2666-5247(21)00285-8)  
385 [5247\(21\)00285-8](https://doi.org/10.1016/S2666-5247(21)00285-8)
- 386 28. Duthie MS, Goto Y, Ghosh P, Mondal D. Impact of sequelae of visceral  
387 leishmaniasis and their contribution to ongoing transmission of *Leishmania*  
388 *donovani*. *Pathog Dis*. 2019 Aug;77(6).
- 389 29. Moore EM, Lockwood DN. Treatment of visceral leishmaniasis. *J Glob Infect Dis*.  
390 2010 May;2(2):151–8.
- 391 30. Meheus F, Abuzaid AA, Baltussen R, Younis BM, Balasegaram M, Khalil EAG, et  
392 al. The economic burden of visceral leishmaniasis in Sudan: an assessment of  
393 provider and household costs. *Am J Trop Med Hyg*. 2013 Dec;89(6):1146–53.
- 394 31. Olobo-Okao J, Sagaki P. Leishmaniasis in Uganda: historical account and a  
395 review of the literature. *Pan Afr Med J*. 2014;18:16.
- 396
